# Supplementary material for: High-performance ternary π-conjugated copolymers containing diarylethylene units: synthesis, properties, and study of substituent effects on molecular aggregation and charge transport characteristics
Source: Royal Society of Chemistry journal article supplement (doi:10.1039/c8tc04940h), 2018-11-29
Supplement: c8tc04940h1.pdf [file c8tc04940h1.pdf]

## Supporting Information

### **High-performance ternary $\pi$ -conjugated copolymers containing diarylethylene units: synthesis, properties, and study of substituent effects on molecular aggregation and charge transport characteristics**

Congyuan Wei,<sup>a,b</sup> Weifeng Zhang,<sup>a</sup> Yankai Zhou,<sup>a</sup> Jianyao Huang,<sup>a</sup> Dizao Li,<sup>a</sup> Qiang Wang,<sup>a</sup> and Gui Yu<sup>\*a,b</sup>

<sup>a</sup> Beijing National Laboratory for Molecular Sciences, CAS Research/Education Center for Excellence in Molecular Sciences, Institute of Chemistry, Chinese Academy of Sciences, Beijing 100190, P. R. China. \*E-mail: yugui@iccas.ac.cn

<sup>b</sup> School of Chemical Sciences, University of Chinese Academy of Sciences, Beijing 100049, P. R. China

†Authors C. Y. Wei and W. F. Zhang contributed equally to this work.

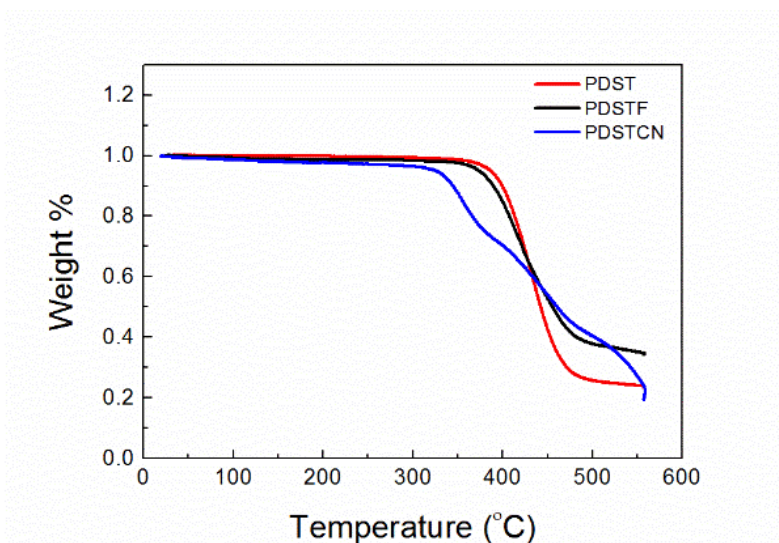

**Fig. S1** Thermogravimetric analyses (TGA) of **PDST**, **PDSTF** and **PDSTCN**.

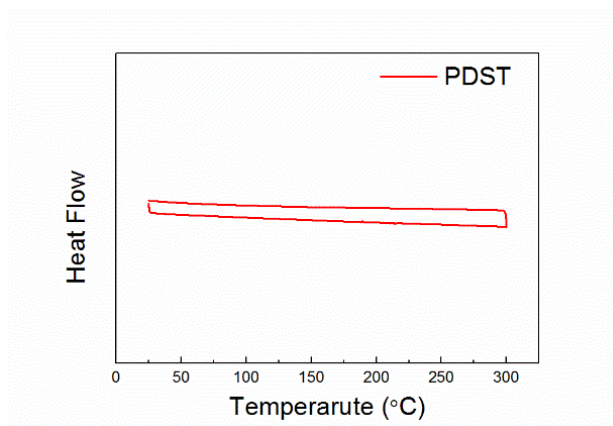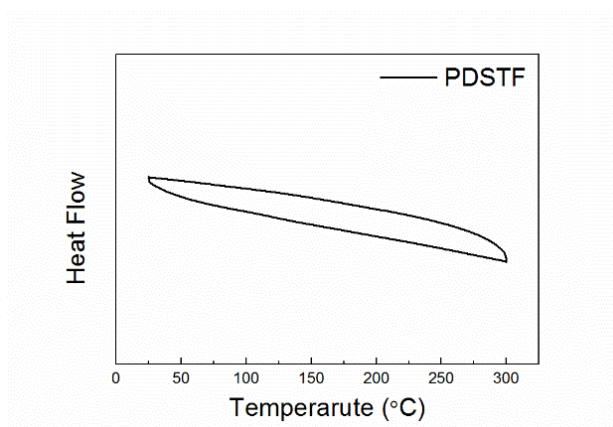

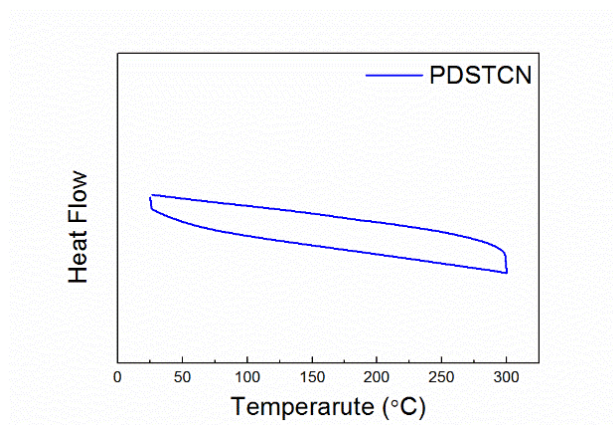

**Fig. S2** Differential scanning calorimetry (DSC) characterization of **PDST**, **PDSTF** and **PDSTCN**.

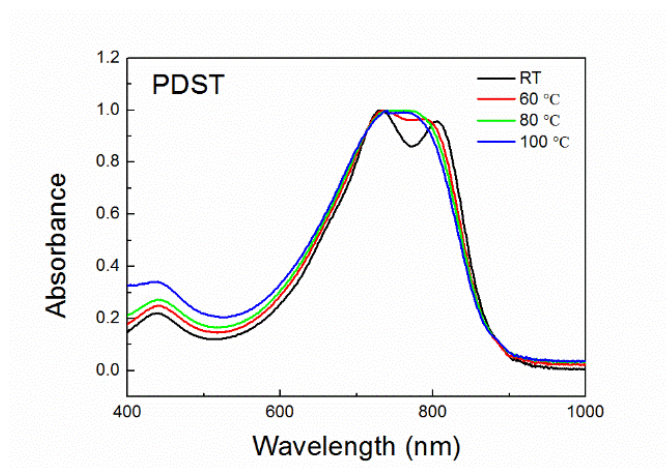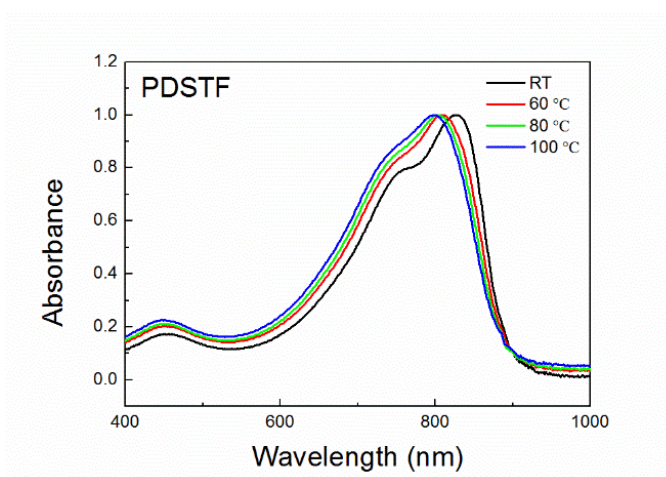

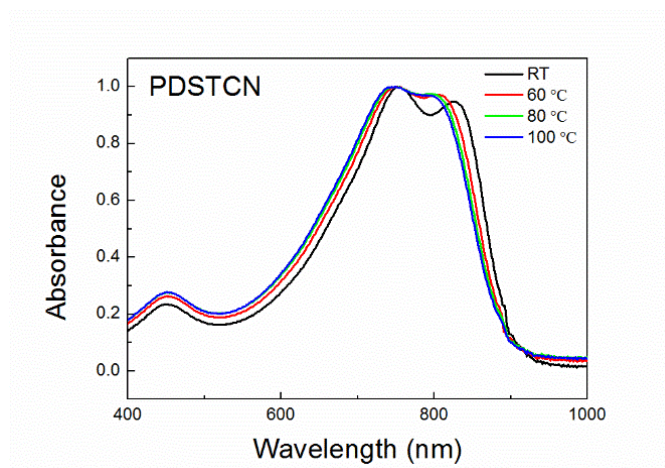

**Fig. S3** Temperature-dependent UV-vis-NIR absorption profiles of **PDST**, **PDSTF** and **PDSTCN** in *o*-dichlorobenzene.

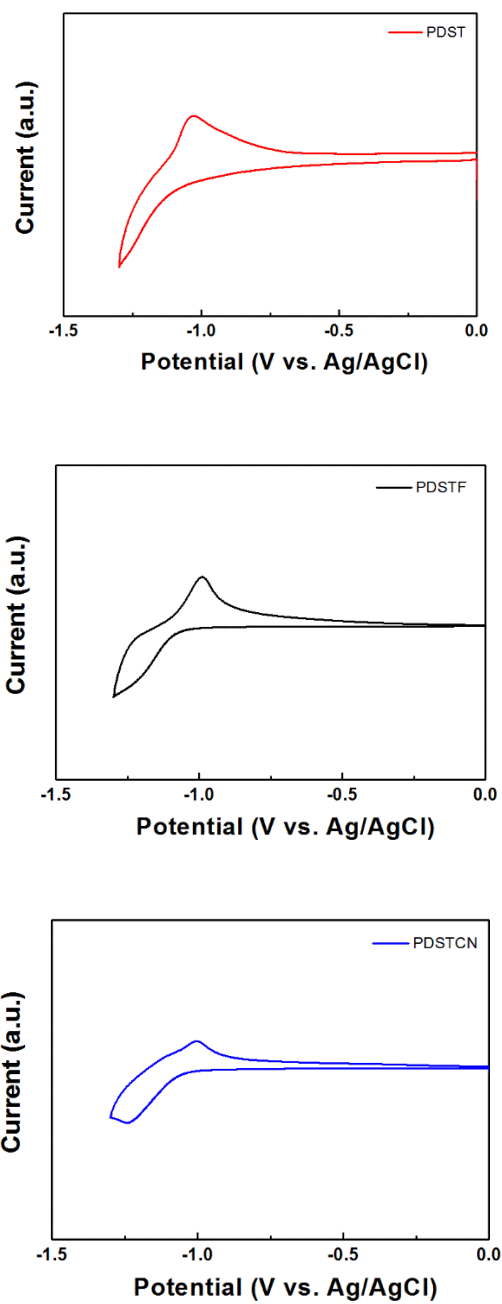

**Fig. S4** The enlarged reduction peaks of cyclic voltammetry characterization of **PDST**, **PDSTF** and **PDSTCN**.

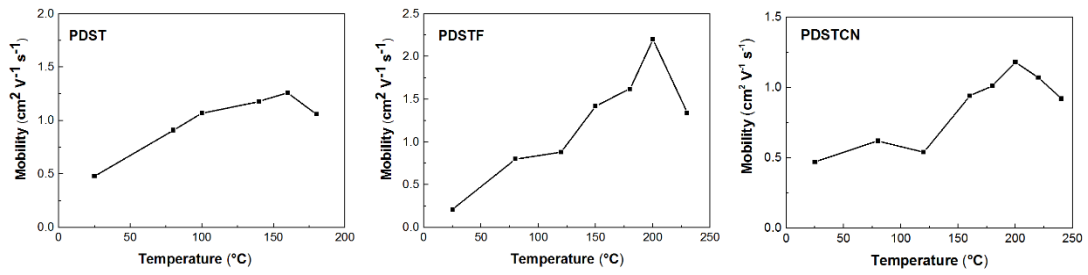

**Fig. S5** The annealing temperature-dependent mobilities of **PDST**, **PDSTF**, and **PDSTCN**-based OFET devices with a 40  $\mu\text{m}$  channel length.

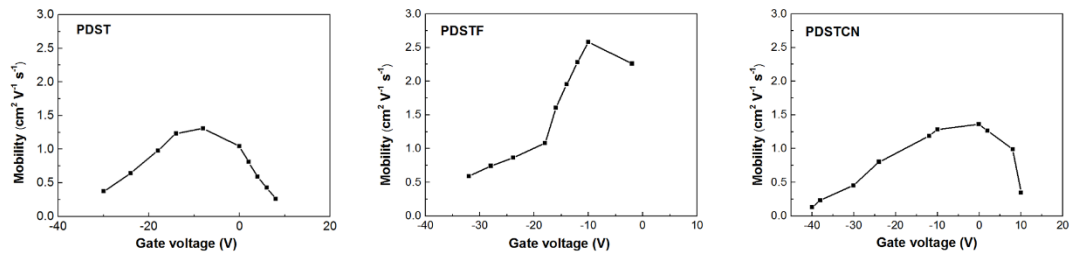

**Fig. S6** The gate voltage dependent mobilities of **PDST**, **PDSTF**, and **PDSTCN**-based OFET devices with a 40  $\mu\text{m}$  channel length.

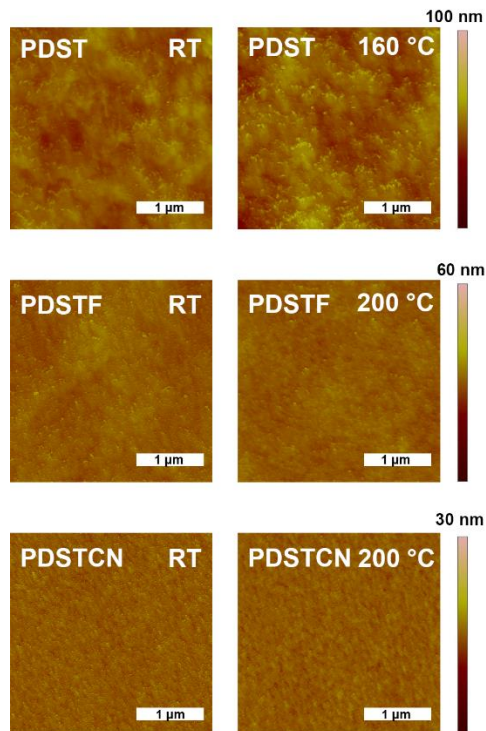

**Fig. S7** AMF topography images (3 × 3  $\mu\text{m}^2$ ) at RT and the corresponding optimal temperatures of **PDST**, **PDSTF** and **PDSTCN** thin film.

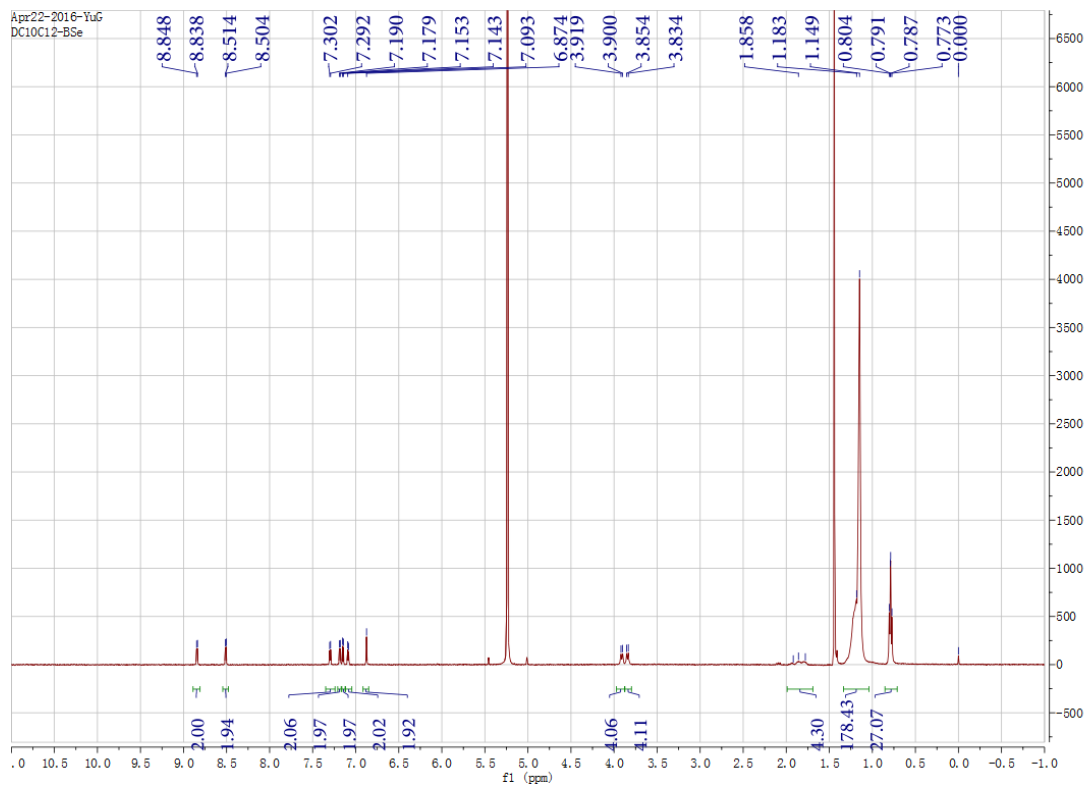

Fig. S8  $^1\text{H}$  NMR spectrum of compound 3.

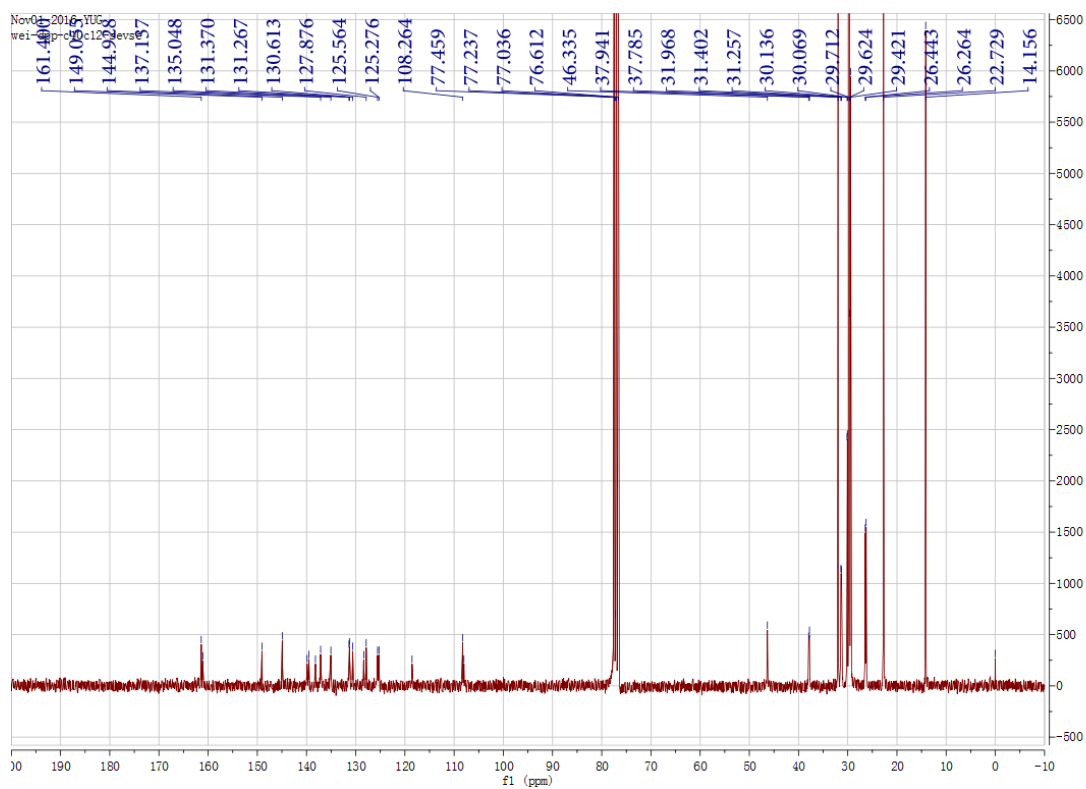

Fig. S9  $^{13}\text{C}$  NMR spectrum of compound 3.

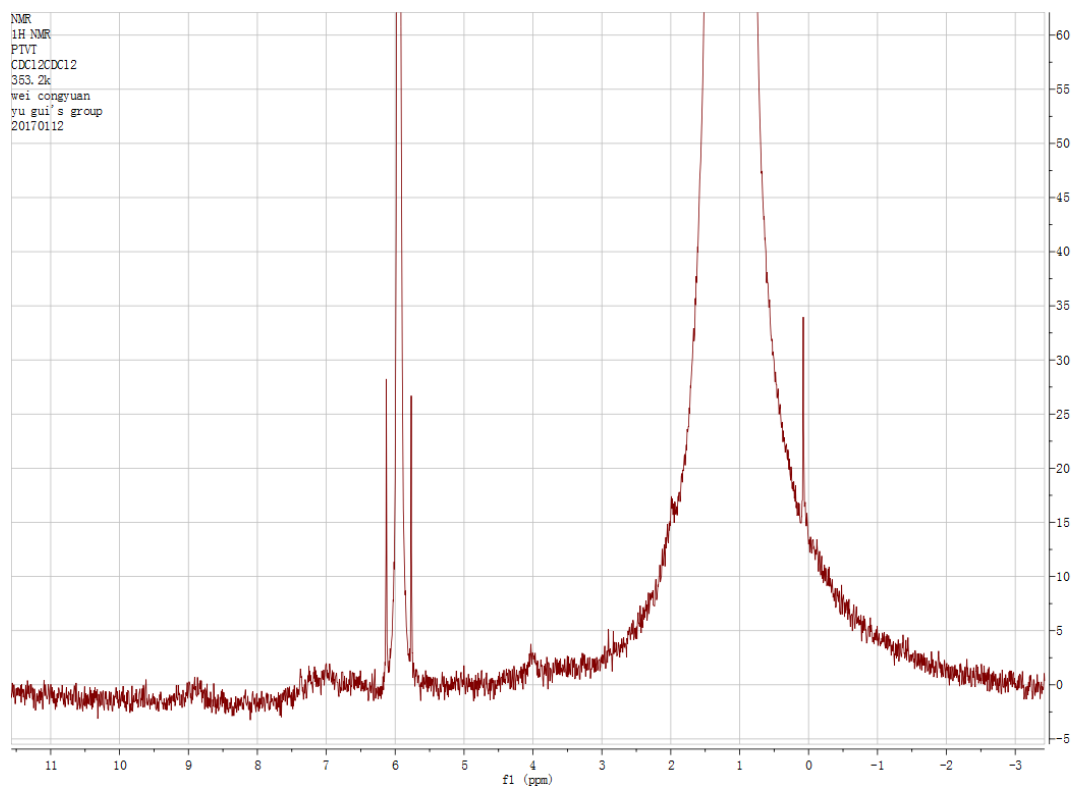

**Fig. S10** <sup>1</sup>H NMR spectrum of the polymer PDST.

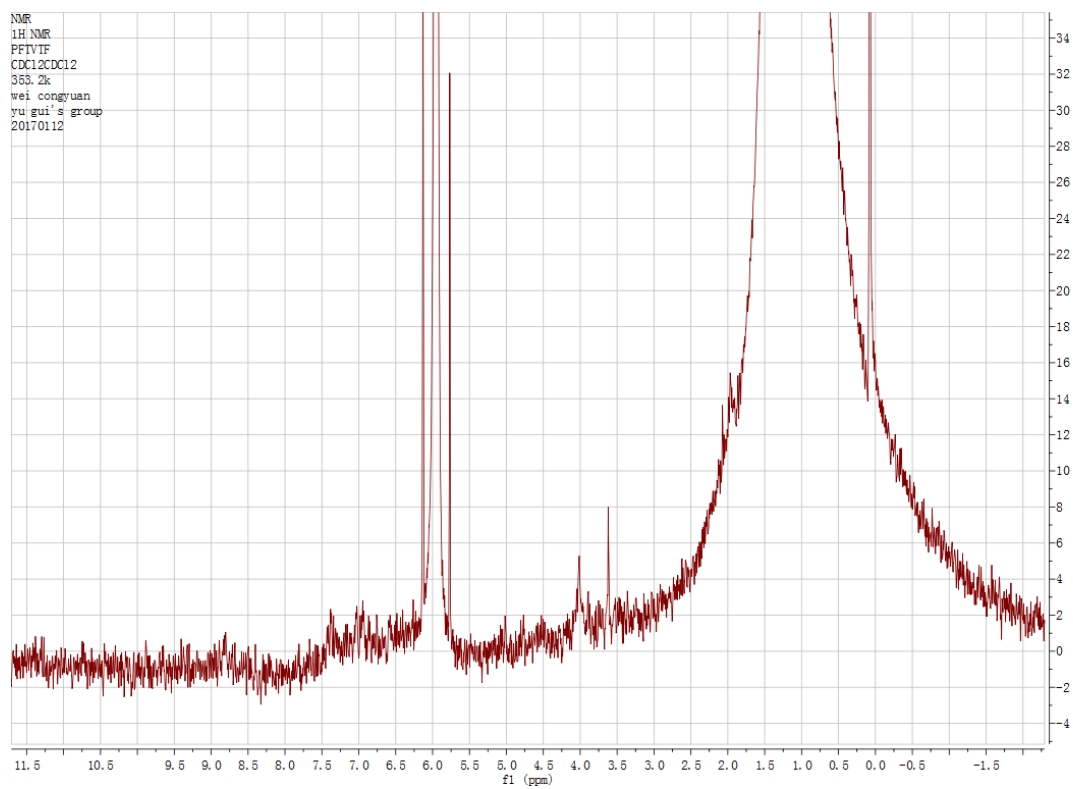

**Fig. S11** <sup>1</sup>H NMR spectrum of the polymer PDSTF.



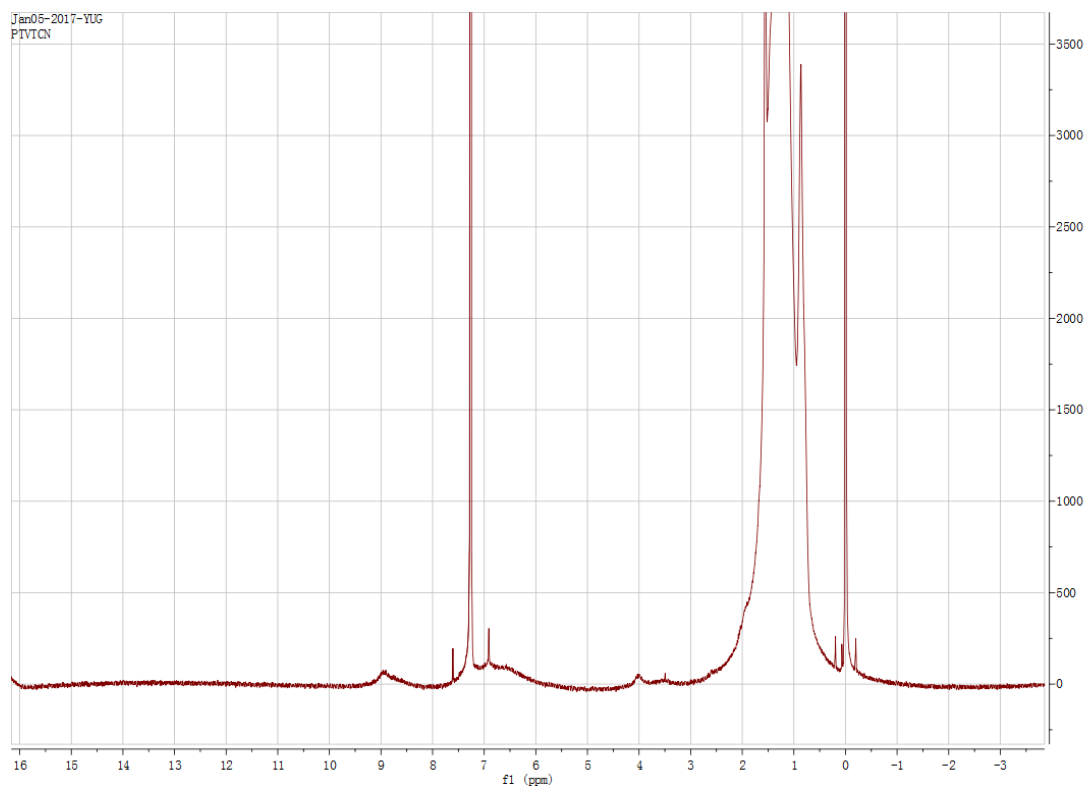

**Fig. S12**  $^1\text{H}$  NMR spectrum of the polymer PDSTCN.

**Table S1** Theoretical calculation results of PDST, PDSTF and PDSTCN

| Polymer | $E_{\text{HOMO}}$ (eV) | $E_{\text{LUMO}}$ (eV) | $E_{\text{gap}}$ (eV) |
|---------|------------------------|------------------------|-----------------------|
| PDST    | -4.61                  | -3.07                  | 1.54                  |
| PDSTF   | -4.66                  | -3.14                  | 1.53                  |
| PDSTCN  | -4.71                  | -3.22                  | 1.50                  |

**Table S2** The XRD data of PDST, PDSTF and PDSTCN thin film

| Polymer | Temp<br>(°C) | Out-of-plane   |                | In-plane       |                | FWHM                | Coherence  |
|---------|--------------|----------------|----------------|----------------|----------------|---------------------|------------|
|         |              | d-d            | $\pi$ - $\pi$  | d-d            | $\pi$ - $\pi$  | (100)               | length (Å) |
|         |              | spacing<br>(Å) | spacing<br>(Å) | spacing<br>(Å) | spacing<br>(Å) | (nm <sup>-1</sup> ) | (Å)        |
| PDST    | RT           | 20.70          |                |                | 3.86           | 0.639               | 87.51      |
|         | 40           | 20.84          |                |                | 3.79           | 0.635               | 88.06      |
|         | 80           | 20.98          | NA             | NA             | 3.80           | 0.605               | 92.43      |
|         | 120          | 20.98          |                |                | 3.81           | 0.523               | 106.92     |
|         | 160          | 20.98          |                |                | 3.80           | 0.469               | 119.23     |
| PDSTF   | RT           | 21.56          |                |                | 3.63           | 0.549               | 101.86     |
|         | 50           | 21.56          |                |                | 3.62           | 0.550               | 101.67     |
|         | 100          | 21.56          | NA             | NA             | 3.61           | 0.463               | 120.78     |
|         | 150          | 21.60          |                |                | 3.62           | 0.399               | 140.15     |
|         | 200          | 21.41          |                |                | 3.66           | 0.308               | 181.56     |
| PDSTCN  | RT           | 20.02          | 3.37           | NA             | 3.39           | 0.384               | 145.63     |
|         | 80           | 20.66          | 3.40           | NA             | 3.42           | 0.322               | 173.67     |
|         | 120          | 21.11          | 3.43           | NA             | 3.45           | 0.258               | 216.75     |
|         | 160          | 21.34          | 3.48           | NA             | 3.48           | 0.230               | 243.13     |
|         | 200          | 21.34          | NA             | NA             | 3.61           | 0.183               | 305.58     |
